# Supplementary material
Source: MDPI journal article supplement (https://www.mdpi.com/2073-4441/15/5/843)
Supplement: s1 [file s1]

*Supporting Information for*

**Combining full-scale ozonation and biological activated carbon filtration (O<sub>3</sub>-BAC) with pilot-scale nanofiltration (NF) to control disinfection by-product formation for treatment of Taihu lake water**

**Pengcheng Xu <sup>1,2</sup>, Huan He <sup>3,\*</sup>, Tian Li <sup>3,4</sup>, Yan Chen <sup>1,2</sup>, Bingzhi Dong <sup>3,4</sup>**

<sup>1</sup> Key Laboratory of Yellow River Water Environment in Gansu Province, Lanzhou Jiaotong University, Lanzhou 730070, China

<sup>2</sup> College of Environment and Municipal Engineering, Lanzhou Jiaotong University, Lanzhou 730070, China

<sup>3</sup> College of Environmental Science and Engineering, Tongji University, Shanghai 200092, China

<sup>4</sup> Key Laboratory of Yangtze River Water Environment, Ministry of Education, Shanghai 200092, China

\*Corresponding author email address: Huan He – [huanhe@alumni.tongji.edu.cn](mailto:huanhe@alumni.tongji.edu.cn)

**8 pages, including 4 figures, 5 tables, and supporting references**

**Table S1.** Characteristics of the NF90 membrane used in this study [29,83].

| Membrane                              | NF90-4040                              |
|---------------------------------------|----------------------------------------|
| Material                              | Fully aromatic polyamide active layers |
| Manufacturer                          | Dow FilmTec™                           |
| Molecular weight cutoff (MWCO)        | 90–180 Da                              |
| Pore radius                           | 0.31–0.38 nm                           |
| Membrane area                         | 7.6 m <sup>2</sup>                     |
| Highest operating temperature         | 115 °F (45°C)                          |
| Highest operating pressure            | 600 psig (41bar)                       |
| Continuous operation pH range (35 °C) | 2–11                                   |
| Allowable free chlorine content       | < 0.1 ppm                              |
| Salt retention                        | MgSO <sub>4</sub> ≥ 97%                |

**Table S2.** Water quality of the raw water and effluents of each water treatment unit/process. <sup>a</sup>

| Parameters                                | Raw water       | SF effluent     | O <sub>3</sub> -BAC effluent | NF effluent     |
|-------------------------------------------|-----------------|-----------------|------------------------------|-----------------|
| Turbidity (NTU)                           | 2.23 ± 0.72     | 0.76 ± 0.70     | 0.31 ± 0.15                  | 0.07 ± 0.02     |
| pH                                        | 8.06 ± 0.11     | 7.70 ± 0.19     | 7.64 ± 0.22                  | 6.47 ± 0.21     |
| Cond (µs/cm)                              | 379.24 ± 5.34   | 382.41 ± 3.94   | 381.35 ± 4.31                | 10.06 ± 1.05    |
| TDS (mg/L)                                | 189.81 ± 2.62   | 191.38 ± 2.01   | 190.88 ± 2.11                | 5.11 ± 0.64     |
| TH (mg/L)                                 | 111.67 ± 8.27   | 111.04 ± 3.21   | 112.20 ± 6.81                | 0.27 ± 0.41     |
| COD <sub>Mn</sub> (mg C/L)                | 2.89 ± 0.18     | 1.80 ± 0.11     | 1.66 ± 0.20                  | 0.32 ± 0.10     |
| UV <sub>254</sub>                         | 0.0466 ± 0.0032 | 0.0372 ± 0.0025 | 0.0286 ± 0.0079              | 0.0004 ± 0.0006 |
| DOC (mg C/L)                              | 3.17 ± 0.42     | 2.41 ± 0.42     | 2.28 ± 0.44                  | 0.03 ± 0.05     |
| SUVA <sup>b</sup> (L/mg/m)                | 1.50 ± 0.27     | 1.59 ± 0.27     | 1.28 ± 0.30                  | 0.88 ± 2.52     |
| C1 (F <sub>max</sub> , R.U.) <sup>c</sup> | 0.96 ± 0.09     | 0.93 ± 0.07     | 0.50 ± 0.12                  | 0.02 ± 0.02     |
| C2 (F <sub>max</sub> , R.U.) <sup>c</sup> | 0.82 ± 0.06     | 0.75 ± 0.08     | 0.42 ± 0.10                  | 0.01 ± 0.01     |
| C3 (F <sub>max</sub> , R.U.) <sup>c</sup> | 0.27 ± 0.01     | 0.22 ± 0.02     | 0.12 ± 0.02                  | ND <sup>d</sup> |
| C4 (F <sub>max</sub> , R.U.) <sup>c</sup> | 0.65 ± 0.10     | 0.61 ± 0.11     | 0.43 ± 0.12                  | 0.15 ± 0.10     |
| Br <sup>-</sup> (mg/L)                    | 0.073 ± 0.006   | 0.065 ± 0.002   | 0.072 ± 0.005                | 0.014 ± 0.000   |
| BrO <sub>3</sub> <sup>-</sup> (mg/L)      | ND <sup>d</sup> | ND <sup>d</sup> | ND <sup>d</sup>              | ND <sup>d</sup> |

Note: <sup>a</sup> All the values are all provided as mean ± standard deviation. All the samples were collected regularly during August 2020 – December 2021 ( $n = 3$  for anions,  $n = 14$  for fluorescence measurements, and  $n = 17$  for the rest parameters). <sup>b</sup>  $SUVA = UV_{254}/DOC$ . <sup>c</sup> Fluorescence measurements were processed with the PARAFAC analysis and signals of the four fluorescent components (i.e., C1, C2, C3, C4) were determined from the EEM spectra. The pilot-scale NF system was operated under the flux of 20L/(m<sup>2</sup>·h). <sup>d</sup> ND means “not detected”.

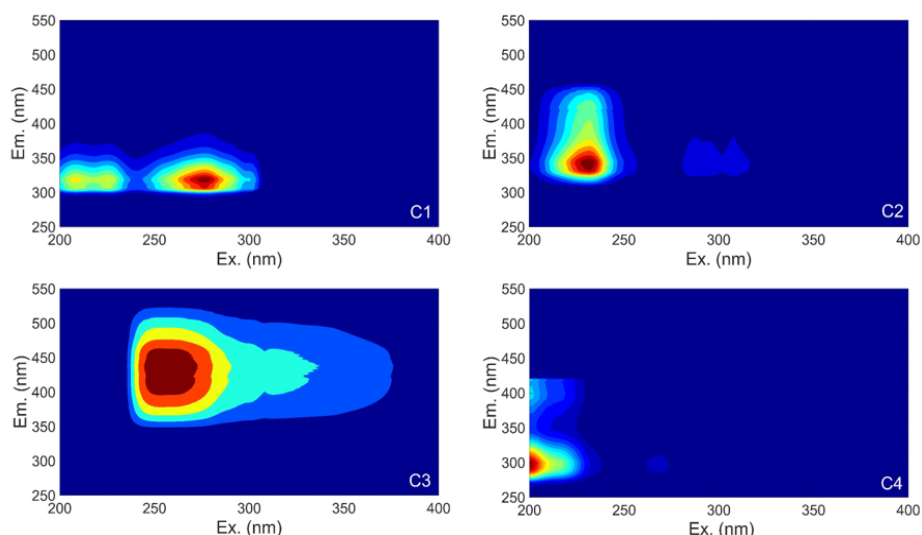

**Fig. S1.** Contour plots of components identified from the EEM spectra using PARAFAC analysis by pooling all the raw water and effluent samples collected during August 2020 – December 2021 ( $n = 269$ ).

**Table S3.** Excitation and emission maxima wavelengths and characteristics of the four components identified by PARAFAC analysis.

| Component | Ex/Em (nm/nm)         | Identification  | References |
|-----------|-----------------------|-----------------|------------|
| C1        | 276/318; 208(226)/318 | Tyrosine-like   | [45–48]    |
| C2        | 232/342               | Tryptophan-like | [49–51]    |
| C3        | 254/438               | Humic-like      | [52–54]    |
| C4        | 200/300               | Free tyrosine   | [55,56]    |

**Table S4.** Typical  $BSF_{THMs}$  values of the raw water and effluents of sand filtration (SF), ozonation ( $O_3$ ), biological activated carbon (BAC) filtration, and nanofiltration (NF). Samples for each type of water were collected in March, 2021, and the values here are reported as average  $\pm$  standard deviation obtained from triplicate assays ( $n = 3$ ).

| Raw water         | SF effluent       | $O_3$ effluent    | BAC effluent      | NF effluent       |
|-------------------|-------------------|-------------------|-------------------|-------------------|
| $0.083 \pm 0.001$ | $0.093 \pm 0.000$ | $0.094 \pm 0.000$ | $0.119 \pm 0.001$ | $0.049 \pm 0.001$ |

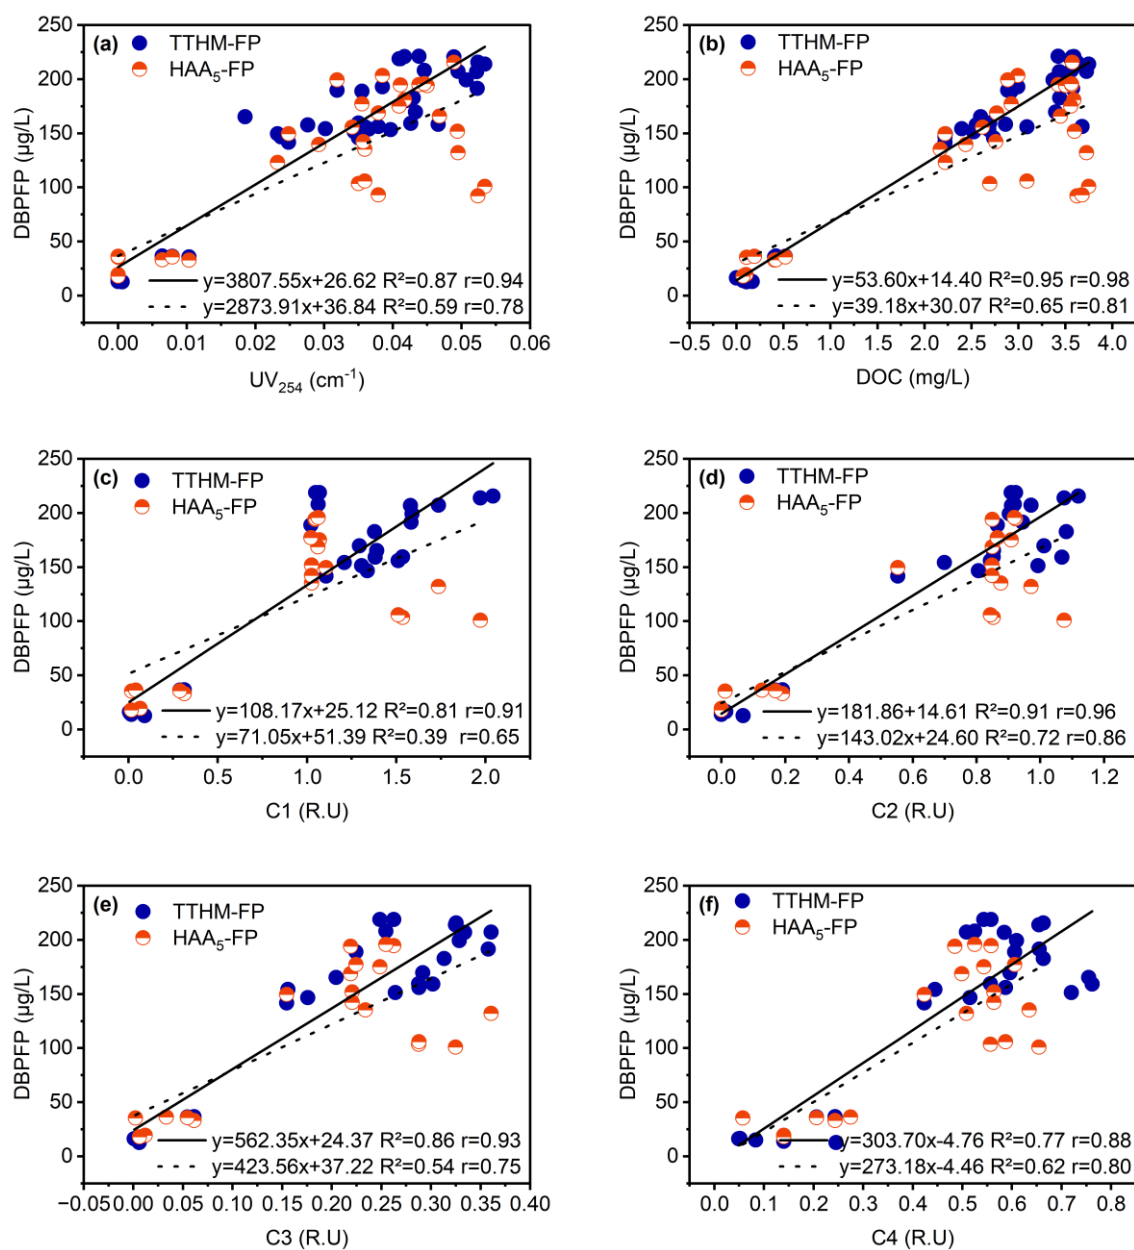

**Fig. S2.** Plots of total THM formation potential (TTHM-FP) and HAA<sub>5</sub> formation potential (HAA<sub>5</sub>-FP) *versus* various NOM parameters, including (a) UV<sub>254</sub>, (b) DOC, (c) EEM C1, (d) EEM C2, (e) EEM C3, and (f) EEM C4. Samples were collected during August 2020 – December 2021.

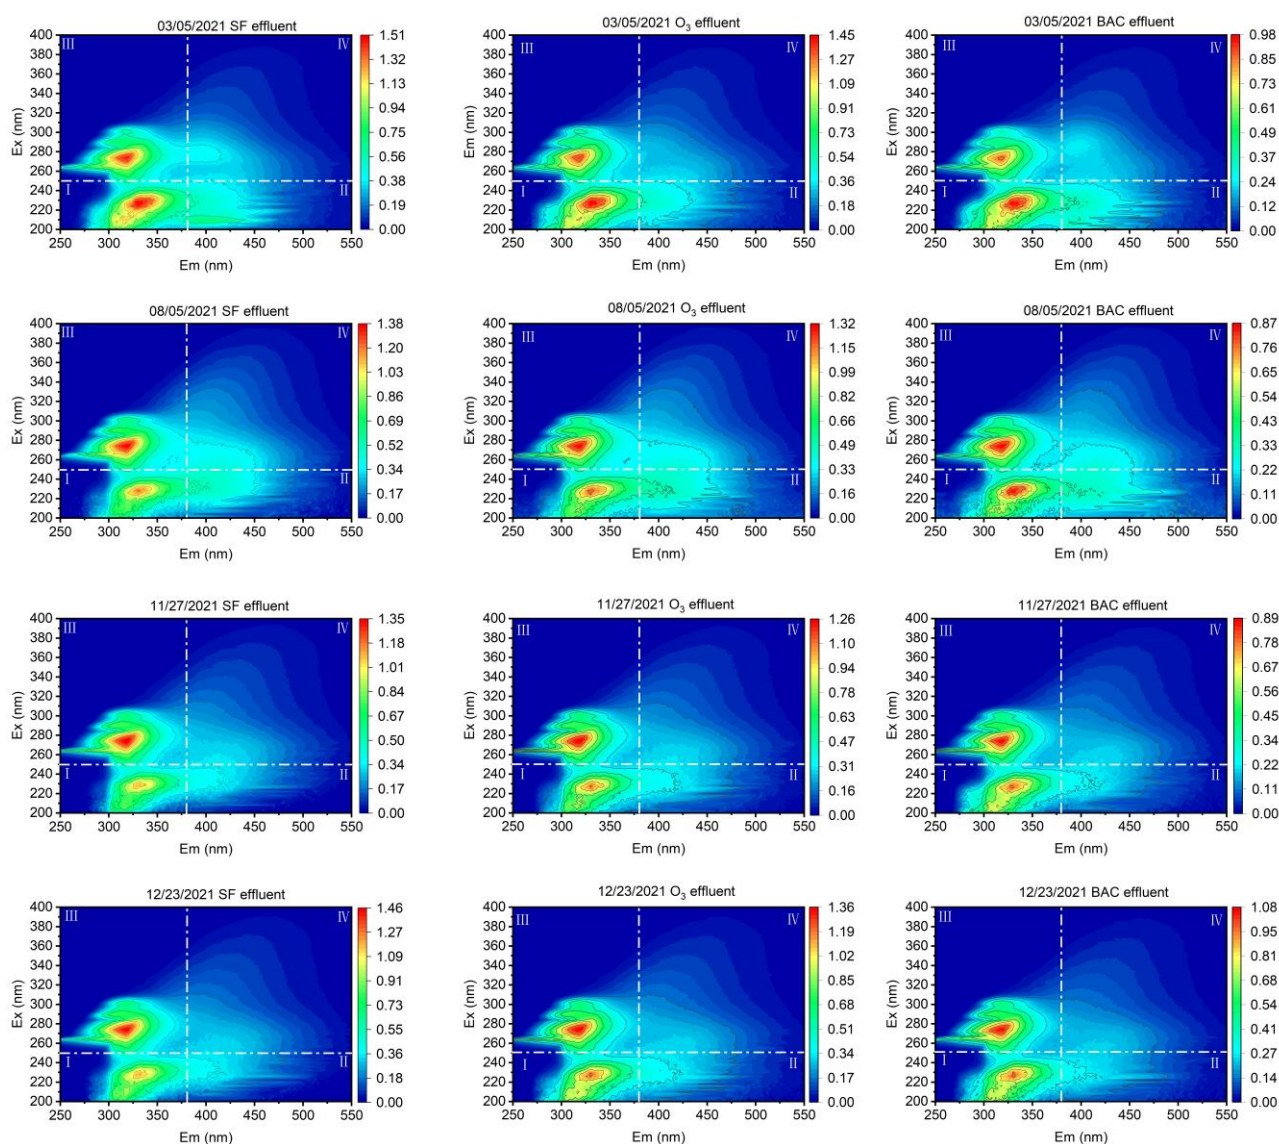

**Fig. S3.** EEM spectra of effluent samples of (**Left column**) sand filtration (SF), (**Middle column**) ozonation ( $O_3$ ), and (**Right column**) biological activated carbon filtration (BAC) collected on selected days (Mar 05, Aug 05, Nov 27, and Dec 23, 2021) during the operation.

**Table S5.** FRI (in units of au.nm<sup>2</sup>) distribution for effluent samples of sand filtration (SF), ozonation (O<sub>3</sub>), and biological activated carbon filtration (BAC) collected on selected days.

| Date               | Region I       |                            |                 | Region II      |                            |                 | Region III     |                            |                 | Region IV      |                            |                 |
|--------------------|----------------|----------------------------|-----------------|----------------|----------------------------|-----------------|----------------|----------------------------|-----------------|----------------|----------------------------|-----------------|
| Month/<br>Day/Year | SF<br>Effluent | O <sub>3</sub><br>Effluent | BAC<br>Effluent |
| 03/05/2021         | 31359.85       | 29854.44                   | 20303.23        | 15837.70       | 13190.90                   | 10042.14        | 10717.17       | 9875.10                    | 6377.14         | 6289.78        | 5557.52                    | 3936.49         |
| 08/05/2021         | 23201.45       | 23981.39                   | 16838.29        | 13219.86       | 15123.23                   | 10288.54        | 10132.28       | 9774.38                    | 6389.46         | 7126.85        | 6930.86                    | 4553.36         |
| 11/27/2021         | 23252.22       | 20708.43                   | 16195.88        | 8729.69        | 9509.11                    | 6543.70         | 9774.38        | 9047.81                    | 6163.70         | 5780.06        | 5271.76                    | 3654.72         |
| 12/23/2021         | 22291.37       | 23512.50                   | 19354.39        | 9611.48        | 10541.11                   | 8035.69         | 10226.22       | 9653.95                    | 7473.93         | 5819.54        | 5433.44                    | 4136.00         |

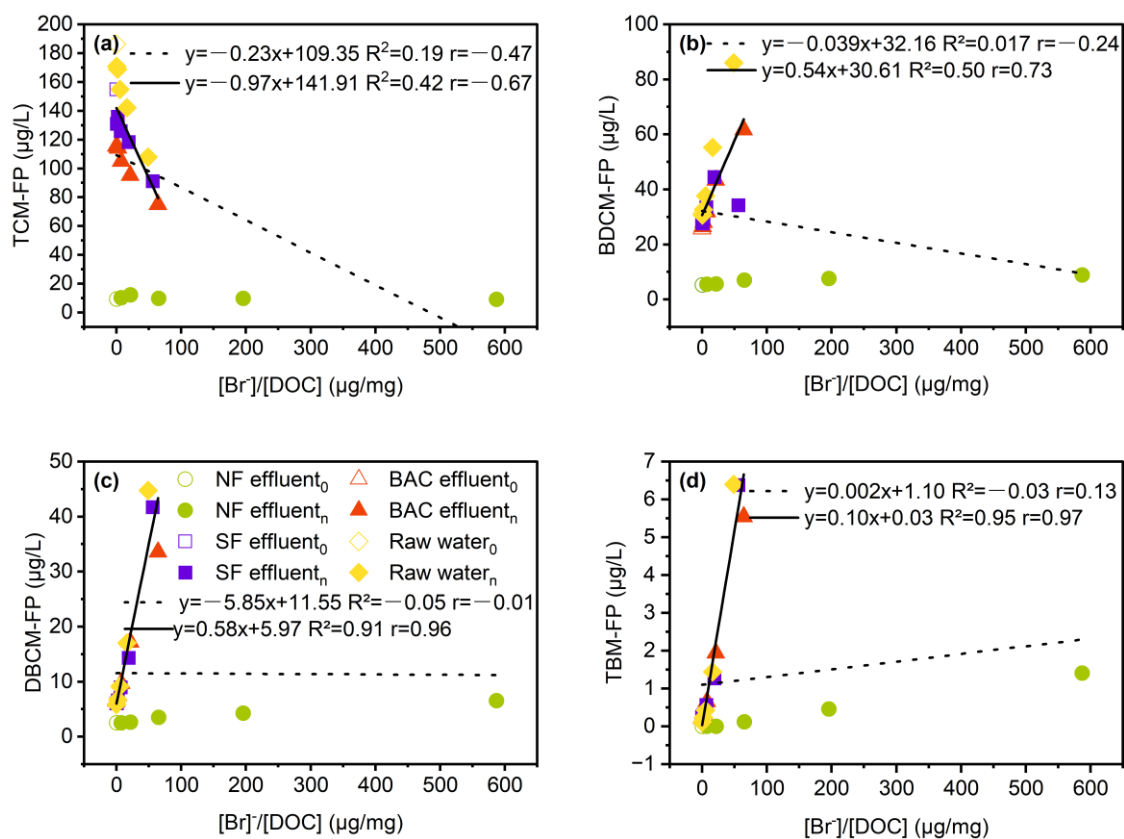

**Fig. S4.** Plots of (a) TCM-FP, (b) BDCM-FP, (c) DBCM-FP, and (d) TBM-FP *versus*  $[Br^-]/[DOC]$  with linear regression lines. NF effluent<sub>0</sub>, SF effluent<sub>0</sub>, BAC effluent<sub>0</sub>, and Raw water<sub>0</sub> represent water samples without spiking additional  $Br^-$ , which were collected in November 2021; NF effluent<sub>n</sub>, SF effluent<sub>n</sub>, BAC effluent<sub>n</sub>, and Raw water<sub>n</sub> represent the same samples but with spiking additional  $Br^-$  (bromide dosage, i.e.,  $\Delta[Br^-] = 2, 6, 18, 54$ , and  $162 \mu\text{g/L}$ ) ( $n = 20$  in total). Linear regression analyses were performed by including (solid line) or excluding (dash line) samples of NF effluent<sub>0</sub> and NF effluent<sub>n</sub>.

## References

(Note: references are listed according to their numbering in the main text)

29. Imbrogno, A.; Tiraferri, A.; Abbenante, S.; Weyand, S.; Schwaiger, R.; Luxbacher, T.; Schäfer, A. I. Organic fouling control through magnetic ion exchange-nanofiltration (MIEX-NF) in water treatment. *J. Membr. Sci.* 2018, 549, 474-485.
45. Ma, Y.; Mao, R.; Li, S. Hydrological seasonality largely contributes to riverine dissolved organic matter chemical composition: Insights from EEM-PARAFAC and optical indicators. *J. Hydrol.* 2021, 595, 125993.
46. Yang, L.; Chen, W.; Zhuang, W. E.; Cheng, Q.; Li, W.; Wang, H.; Guo, W.; Chen, C. T. A.; Liu, M. Characterization and bioavailability of rainwater dissolved organic matter at the southeast coast of China using absorption spectroscopy and fluorescence EEM-PARAFAC. *Estuarine, Coastal Shelf Sci.* 2019, 217, 45-55.
47. Zhang, Y.; Liu, X.; Wang, M.; Qin, B. Compositional differences of chromophoric dissolved organic matter derived from phytoplankton and macrophytes. *Org. Geochem.* 2013, 55, 26-37.
48. Lapierre, J. F.; Frenette, J. J. Effects of macrophytes and terrestrial inputs on fluorescent dissolved organic matter in a large river system. *Aquat. Sci.* 2009, 71(1), 15-24.
49. Mssivotte, P.; Frenette, J. Spatial connectivity in a large river system: resolving the sources and fate of dissolved organic matter. *Ecol. Appl.* 2011, 21(7), 2600-2617.
50. Shen, J.; Liu, C.; Lv, Q.; Gu, J.; Su, M.; Wang, S.; Chai, Y.; Cheng, C.; Wu, J. Novel insights into impacts of the COVID-19 pandemic on aquatic environment of Beijing-Hangzhou Grand Canal in southern Jiangsu region. *Water Res.* 2021, 193, 116873.
51. Zhou, Y.; Jeppesen, E.; Zhang, Y.; Shi, K.; Liu, X.; Zhu, G. Dissolved organic matter fluorescence at wavelength 275/342nm as a key indicator for detection of point-source contamination in a large chinese drinking water lake. *Chemosphere* 2016, 144, 503-509.
52. He, W.; Hur, J. Conservative behavior of fluorescence eem-parafac components in resin fractionation processes and its applicability for characterizing dissolved organic matter. *Water Res.* 2015, 83, 217-226.
53. Bagtho, S. A.; Sharma, S. K.; Amy, G. L. Tracking natural organic matter (NOM) in a drinking water treatment plant using fluorescence excitation–emission matrices and PARAFAC. *Water Res.* 2011, 45(2), 797-809.
54. Stedmon, C.A.; Markager, S. Resolving the variability of dissolved organic matter fluorescence in a temperate estuary and its catchment using PARAFAC analysis. *Limnol. Oceanogr.* 2005, 50(2), 686–697.
55. Zhou, Y.; Shi, K.; Zhang, Y.; Jeppesen, E.; Liu, X.; Zhou, Q.; Wu, H.; Tang, X.; Zhu, G. Fluorescence peak integration ratio IC:IT as a new potential indicator tracing the compositional changes in chromophoric dissolved organic matter. *Sci. Total Environ.* 2017, 574, 1588-1598.
56. Liu, L.; Huang, Q.; Zhang, Y.; Qin, B.; Zhu, G. Excitation-emission matrix fluorescence and parallel factor analyses of the effects of N and P nutrients on the extracellular polymeric substances of microcystis aeruginosa. *Limnologica* 2017, 63, 18-26.
83. DuPont Water Solutions, FilmTec™NF90-4040, <https://www.dupont.com/products/filmtecnf904040.html>, accessed date: 1 October 2022.
